# Supplementary material for: How cyanobacteria pose new problems to old methods: challenges in microarray time series analysis
Source: PubMed Central journal article supplement (PMC3679775; doi:10.1186/1471-2105-14-133), 2013-04-21
Supplement: 1471-2105-14-133-S1.pdf [file 1471-2105-14-133-S1.pdf]

# How cyanobacteria pose new problems to old methods: Challenges in microarray time series analysis

Robert Lehmann<sup>\*1</sup>, Rainer Machné<sup>3</sup>, Jens Georg<sup>4</sup>, Manuela Benary<sup>1</sup>, Ilka Axmann<sup>1,2</sup>, Ralf Steuer<sup>1</sup>

<sup>1</sup>Institute for Theoretical Biology, Humboldt University Berlin, Invalidenstraße 43, D-10115, Berlin, Germany

<sup>2</sup>Institute for Theoretical Biology, Charité Universitätsmedizin, Invalidenstraße 43, D-10115, Berlin, Germany

<sup>3</sup>Institute for Theoretical Chemistry, University of Vienna, Währingerstraße 17, A-1090, Vienna, Austria

<sup>4</sup>Faculty of Biology and Freiburg Initiative in Systems Biology, University of Freiburg, Schänzlestraße 1, D-79104, Freiburg, Germany

Email: Robert Lehmann\* - r.lehmann@biologie.hu-berlin.de; Rainer Machne - raim@tbi.univie.ac.at; Jens Georg - jens.georg@biologie.uni-freiburg.de; Manuela Benary - manuela.benary@cms.hu-berlin.de; Ilka M. Axmann - ilka.axmann@charite.de; Ralf Steuer - ralf.steuer@hu-berlin.de;

\*Corresponding author

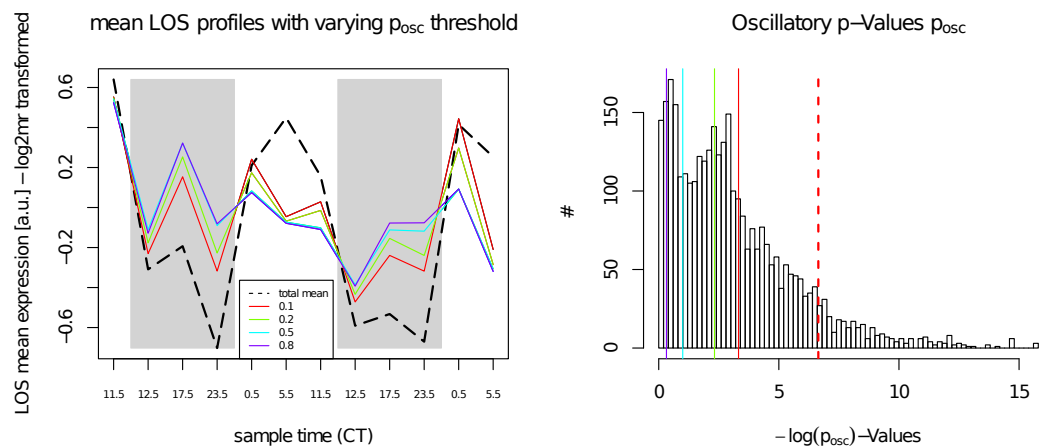

Figure 1: Global expression oscillation in unnormalized data (A, black dashed line). Mean profiles of gene sets used for LOS normalization using different cutoffs for  $p_{osc}$ . (B) The distribution of  $p_{osc}$  in the complete dataset with cutoffs indicated with identical colors to (A). The red dashed line marks the significance level of 0.001.

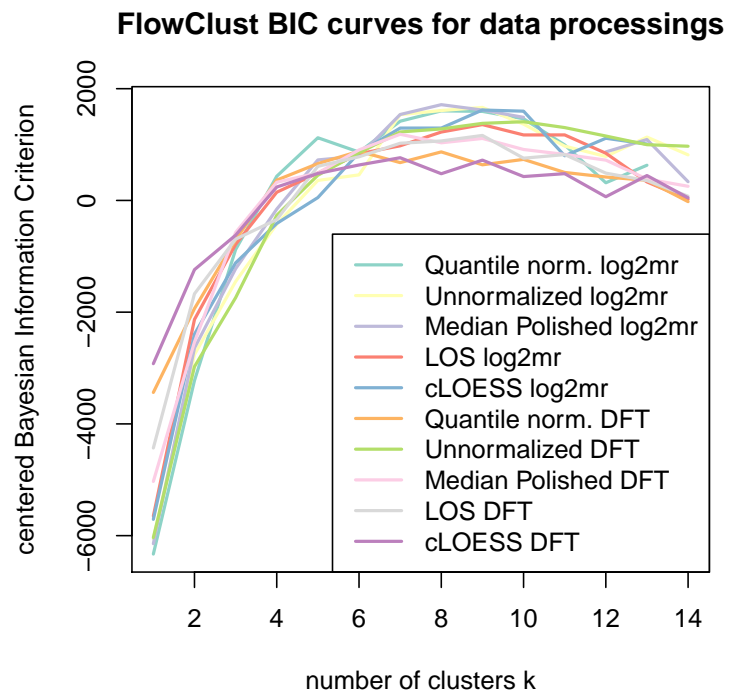

Figure 2: Number of Clusters in the Dataset. Bayesian information criterion for clusterings of data with different normalization and transformation as provided by FlowClust.

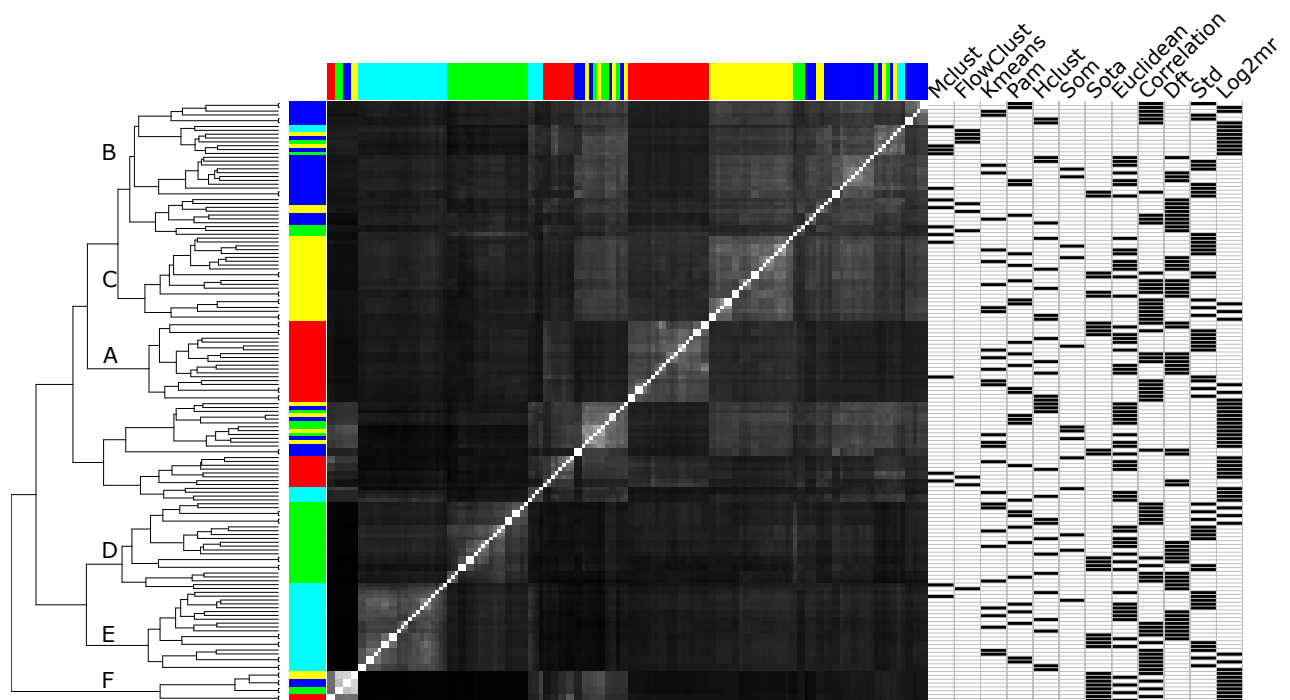

Figure 3: Comparing Clustering Results with the normalized Variation of Information between all clustering combinations with  $k=8$ . The visualization is identical to Figure 3.

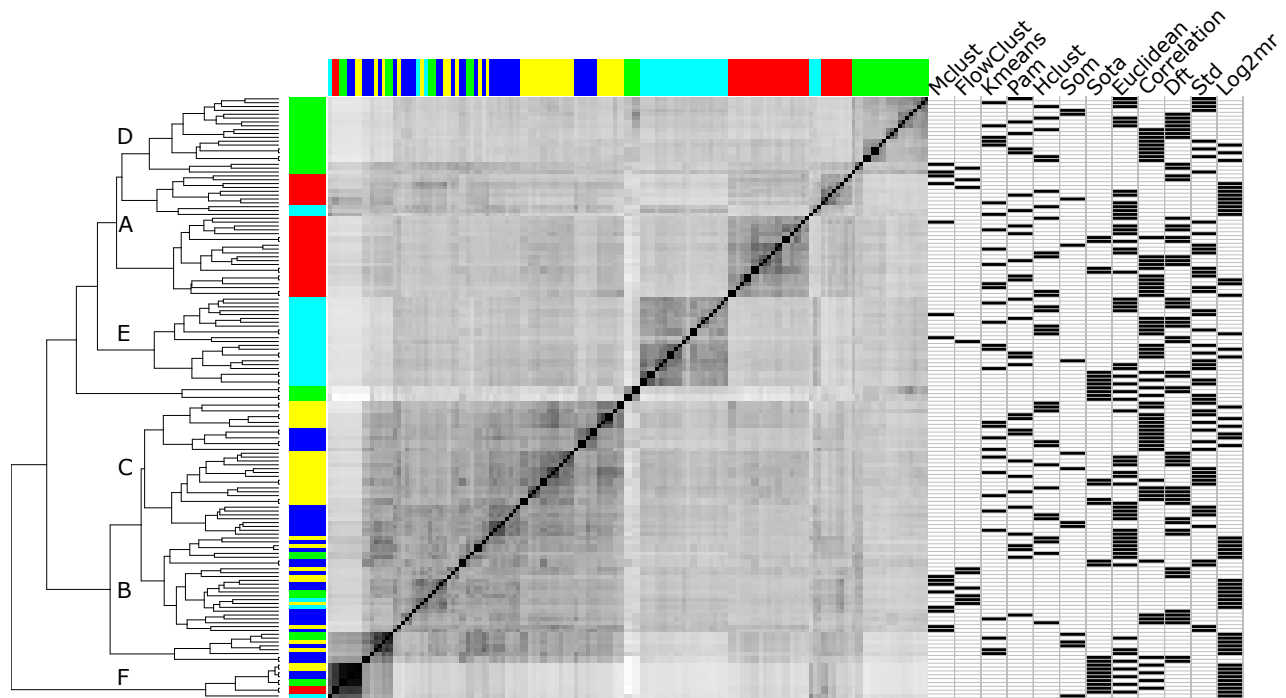

Figure 4: Comparing Clustering Results with the adjusted Rand index between all clustering combinations with  $k=8$ . The visualization is identical to Figure 3. The dendrogram of clusterings varies in comparison to the similarity matrices using mutual information (Fig.3) and normalized Variation of Information (Fig.S3). Subgroup A contains only a small subbranch of three cLOESS normalized clusterings. The remaining clusterings of this subbranch are moved into subgroup B, which is consequently more diverse.



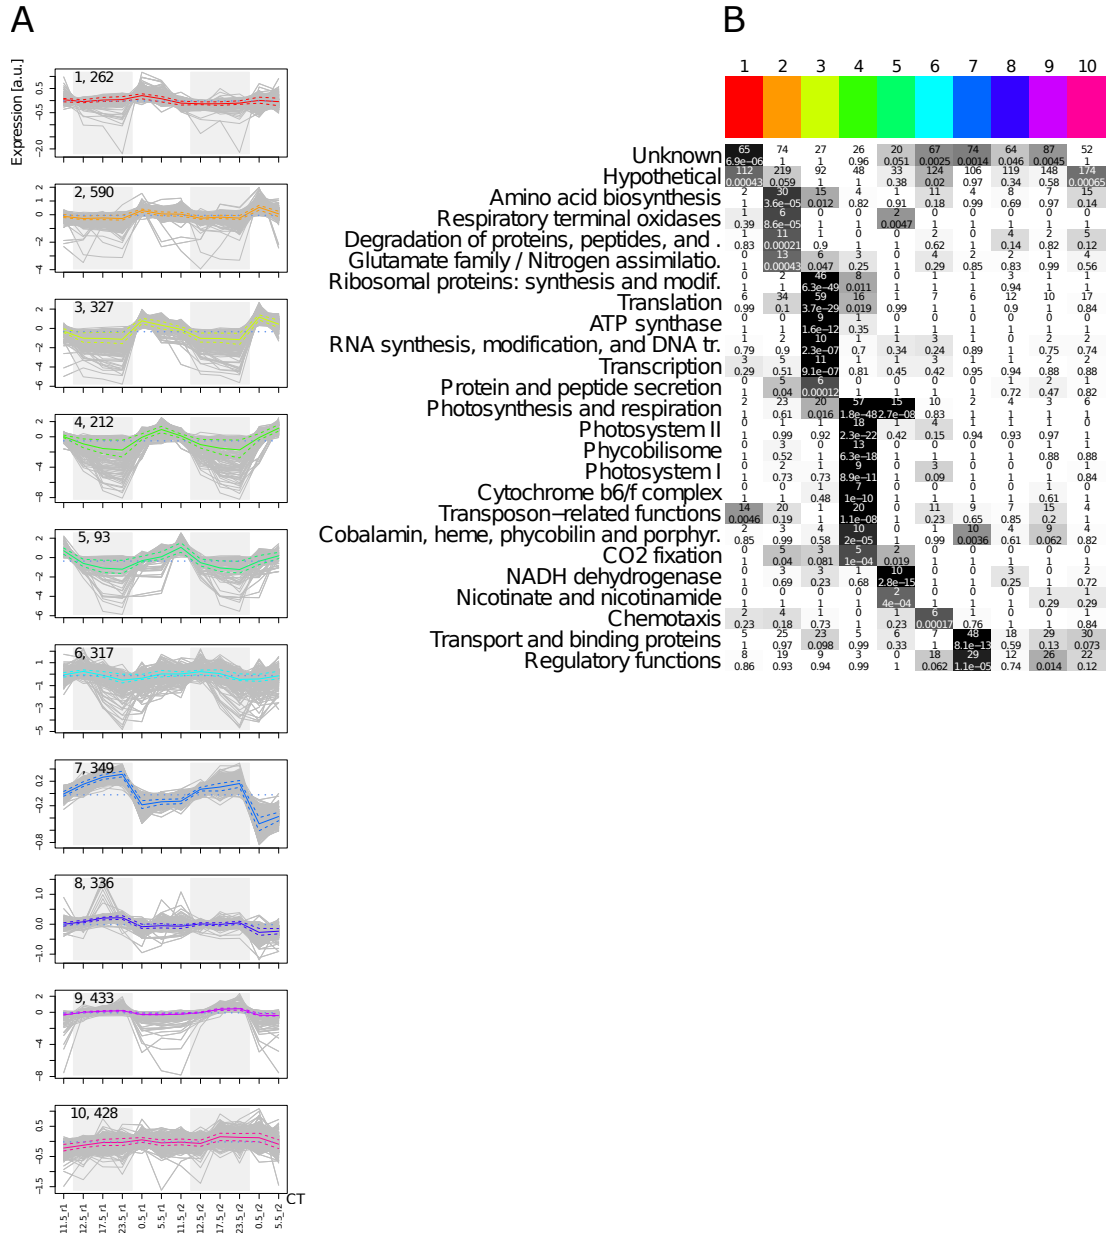

Figure 6: Clustering and functional enrichment for median polished data. The visualization is identical to Figure S5.

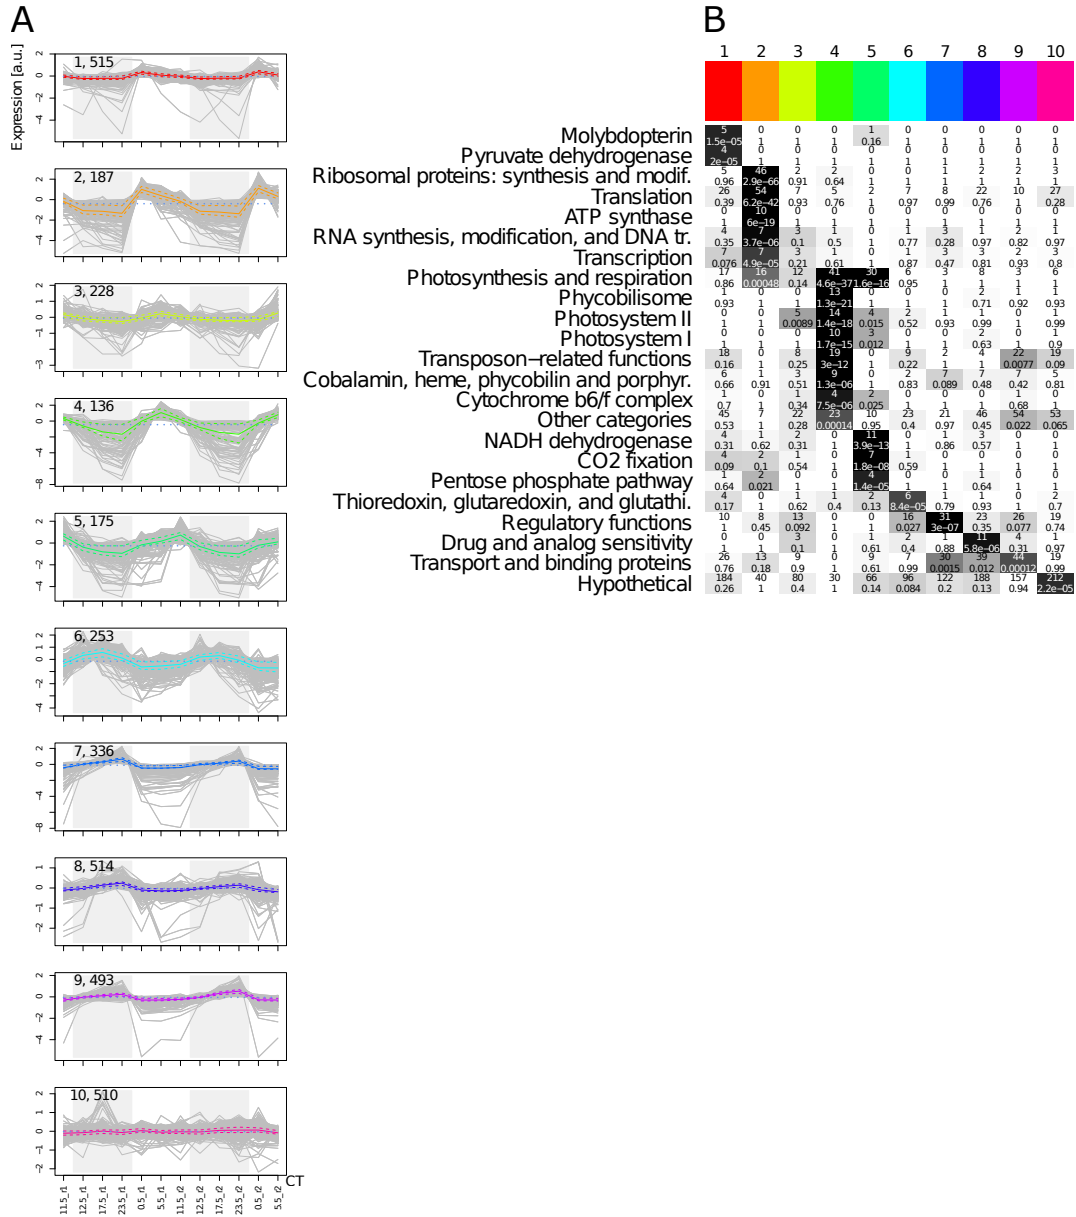

Figure 7: Clustering and functional enrichment for quantile normalized data. The visualization is identical to Figure S5.

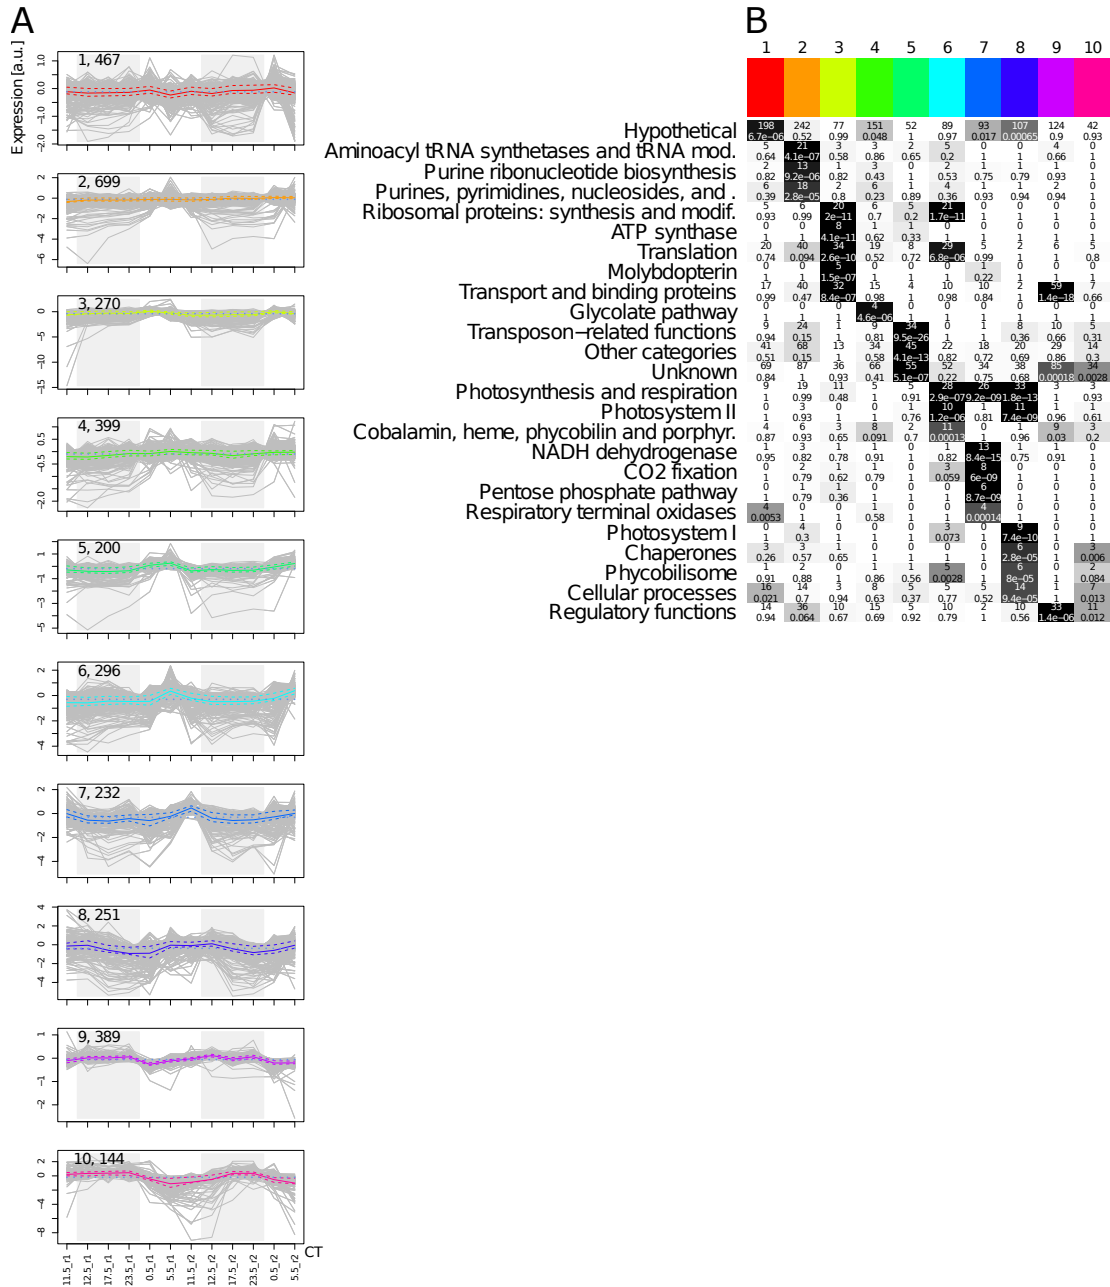

Figure 8: Clustering and functional enrichment for cyclic LOESS normalized data. The visualization is identical to Figure S5.
